# Supplementary material
Source: PubMed Central journal article supplement (PMC6442056)
Supplement: supp_RA118.006943_142292_2_supp_274457_plxw6z.pdf [file supp_RA118.006943_142292_2_supp_274457_plxw6z.pdf]

# Supporting Information

The role of annealing and fragmentation in human tau aggregation dynamics

**Carol J. Huseby<sup>‡</sup>, Ralf Bundschuh<sup>‡,§</sup>, and Jeff Kuret<sup>‡,¶,1</sup>**

*From the<sup>‡</sup>Interdisciplinary Biophysics Graduate Program, The Ohio State University, Columbus, Ohio 43210; <sup>§</sup>Departments of Physics, Internal Medicine, and Chemistry & Biochemistry; The Ohio State University, Columbus, Ohio 43210; <sup>¶</sup>Department of Biological Chemistry & Pharmacology, The Ohio State University, Columbus, Ohio 43210*

<sup>1</sup>To whom correspondence should be addressed: Jeff Kuret, Ph.D., The Ohio State University College of Medicine, 1060 Carmack Rd., Columbus, OH 43210, USA, Tel: (614) 688-5899; Fax: (614) 292-5379, E-mail: [kuret.3@osu.edu](mailto:kuret.3@osu.edu)

## Contents:

**Figure S1. Mathematical model of tau aggregation.**

**Figure S2. Fits of mathematical models to protomer concentration time series.**

**Figure S3. Fits of mathematical models to length distribution time series.**

$$\frac{dc_1}{dt} = -2(k_{n_+}c_1^2 - k_{n_-}c_2) - \sum_{i=3}^N (k_{e_+}c_1c_{i-1} - k_{e_-}c_i) - \sum_{i=10}^N 2(k_{n_{2+}}ic_1c_1^2 - k_{n_{2-}}ic_1c_2) \quad (S1)$$

$$\frac{dc_2}{dt} = (k_{n_+}c_1^2 - k_{n_-}c_2) - (k_{e_+}c_1c_2 - k_{e_-}c_3) + \sum_{i=10}^N (k_{n_{2+}}ic_1c_1^2 - k_{n_{2-}}ic_1c_2) \quad (S2)$$

$$\frac{dc_3}{dt} = (k_{e_+}c_1c_2 - k_{e_-}c_3) - (k_{e_+}c_1c_3 - k_{e_-}c_4) - k_{an} \left(\frac{3}{N}\right)^\alpha \sum_{i=3}^{N-3} 2c_3c_i \left(\frac{i}{N}\right)^\alpha + k_{fr}2 \sum_{i=6}^N c_i \left(\frac{i}{N}\right)^\beta \quad (S3)$$

$$\frac{dc_4}{dt} = (k_{e_+}c_1c_3 - k_{e_-}c_4) - (k_{e_+}c_1c_4 - k_{e_-}c_5) - k_{an} \left(\frac{4}{N}\right)^\alpha \sum_{i=3}^{N-4} 2c_4c_i \left(\frac{i}{N}\right)^\alpha + k_{fr}2 \sum_{i=7}^N c_i \left(\frac{i}{N}\right)^\beta \quad (S4)$$

$$\frac{dc_5}{dt} = (k_{e_+}c_1c_4 - k_{e_-}c_5) - (k_{e_+}c_1c_5 - k_{e_-}c_6) - k_{an} \left(\frac{5}{N}\right)^\alpha \sum_{i=3}^{N-5} 2c_5c_i \left(\frac{i}{N}\right)^\alpha + k_{fr}2 \sum_{i=8}^N c_i \left(\frac{i}{N}\right)^\beta \quad (S5)$$

$$j = 6:N - 4$$

$$\begin{aligned} \frac{dc_j}{dt} = & (k_{e_+}c_1c_{j-1} - k_{e_-}c_j) - (k_{e_+}c_1c_j - k_{e_-}c_{j+1}) \\ & + k_{an} \sum_{i=3}^{(N-3)-(N-j)} c_i c_{j-i} \left(\frac{i}{N}\right)^\alpha \left(\frac{j-i}{N}\right)^\alpha - k_{an} \sum_{i=3}^{N-j} 2c_j c_i \left(\frac{i}{N}\right)^\alpha \left(\frac{j}{N}\right)^\alpha \\ & + k_{fr}2 \sum_{i=j+3}^N c_i \left(\frac{i}{N}\right)^\beta - k_{fr} \left(\frac{j}{N}\right)^\beta (j-5)c_j \end{aligned} \quad (S6)$$

$$\begin{aligned} \frac{dc_{N-3}}{dt} = & (k_{e_+}c_1c_{N-4} - k_{e_-}c_{N-3}) - (k_{e_+}c_1c_{N-3} - k_{e_-}c_{N-2}) \\ & + k_{an} \sum_{i=3}^{(N-6)} c_i c_{(N-3)-i} \left(\frac{i}{N}\right)^\alpha \left(\frac{(N-3)-i}{N}\right)^\alpha - k_{an} 2c_{N-3}c_3 \left(\frac{3}{N}\right)^\alpha \left(\frac{N-3}{N}\right)^\alpha \\ & - k_{fr} \left(\frac{N-3}{N}\right)^\beta ((N-3)-5)c_{N-3} \end{aligned} \quad (S7)$$

$$\begin{aligned} \frac{dc_{N-2}}{dt} = & (k_{e_+}c_1c_{N-2} - k_{e_-}c_{N-1}) - (k_{e_+}c_1c_{N-1} - k_{e_-}c_N) \\ & + k_{an} \sum_{i=3}^{(N-5)} c_i c_{(N-2)-i} \left(\frac{(N-2)-i}{N}\right)^\alpha \left(\frac{i}{N}\right)^\alpha - k_{fr} \left(\frac{N-2}{N}\right)^\beta ((N-2)-5)c_{N-2} \end{aligned} \quad (S8)$$

$$\begin{aligned} \frac{dc_{N-1}}{dt} = & (k_{e_+}c_1c_{N-2} - k_{e_-}c_{N-1}) - (k_{e_+}c_1c_{N-1} - k_{e_-}c_N) \\ & + k_{an} \sum_{i=3}^{(N-4)} c_i c_{(N-1)-i} \left(\frac{i}{N}\right)^\alpha \left(\frac{(N-1)-i}{N}\right)^\alpha - k_{fr} \left(\frac{N-1}{N}\right)^\beta ((N-1)-5)c_{N-1} \end{aligned} \quad (S9)$$

$$\frac{dc_N}{dt} = (k_{e_+}c_1c_{N-1} - k_{e_-}c_N) + k_{an} \sum_{i=3}^{(N-3)} c_i c_{N-i} \left(\frac{i}{N}\right)^\alpha \left(\frac{N-i}{N}\right)^\alpha - k_{fr} \left(\frac{N}{N}\right)^\beta (N-5)c_N \quad (S10)$$

**Figure S1. Mathematical model of tau aggregation.** The time-dependent evolution of tau filaments of protomer length  $N$  was modeled with a system of ordinary differential equations assuming reversible association of monomers. The number of equations was limited to  $N = 900$ . The model included terms for the primary processes of nucleation and elongation (black font), and the secondary processes of secondary nucleation (green font), end-to-end annealing (blue font) and fragmentation (red font). The final model incorporating terms for all three secondary processes is termed “NEAFS”.

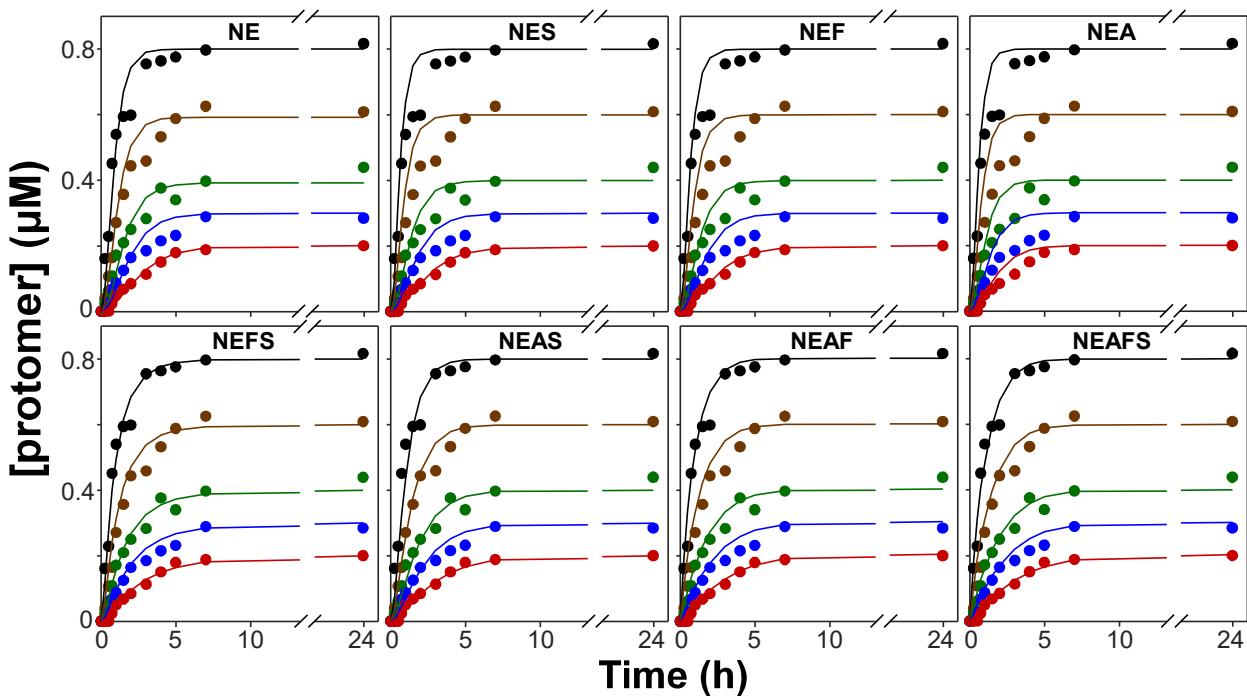

**Figure S2. Fits of mathematical models to protomer concentration time series.** Mathematical models composed of nucleation-elongation (NE) and either one (NES, NEF, NEA), two (NEFS, NEAS, NEAF) or three (NEAFS) secondary processes were simultaneously fit to protomer concentration and length distribution time series (*i.e.*, the same data as shown in **Fig. 6A**). Each point represents protomer concentration as a function of time (0 – 24 h at 37°C) and starting bulk 2N4R tau concentration (0.4  $\mu\text{M}$ , red; 0.5  $\mu\text{M}$ , blue; 0.6  $\mu\text{M}$ , green; 0.8  $\mu\text{M}$ , brown; 1  $\mu\text{M}$ , black), whereas solid lines depict a simulation of the best fit of each model to the data points.

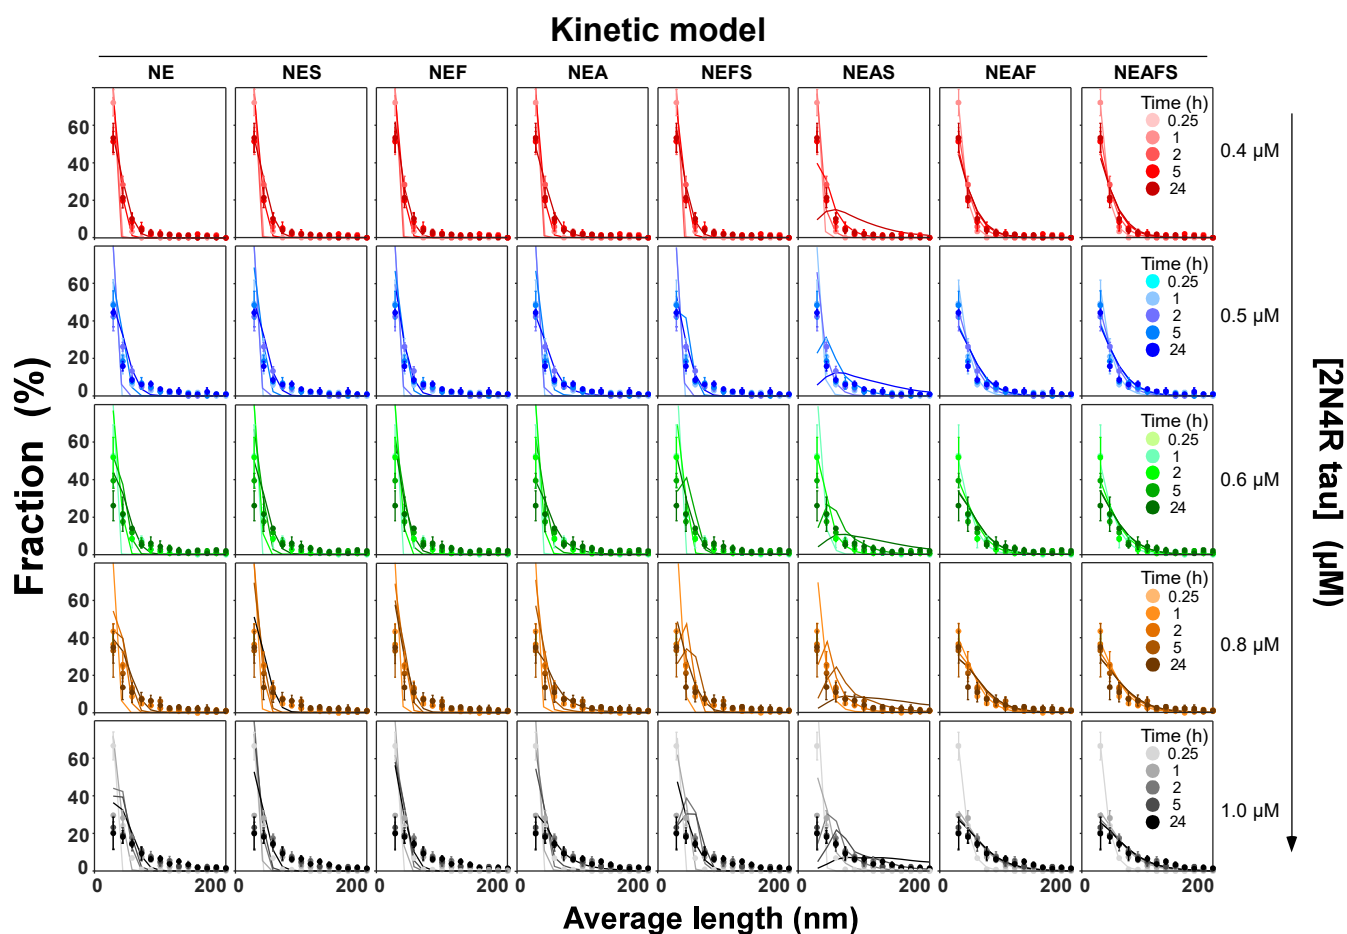

**Figure S3. Fits of mathematical models to length distribution time series.** Mathematical models composed of nucleation-elongation (NE) with either one (NES, NEF, NEA), two (NEFS, NEAS, NEAF) or three (NEAFS) secondary processes were simultaneously fit to protomer concentration and length distribution time series (*i.e.*, the same data shown in **Fig. 6B**). Each set of points represents tau filament length distribution as a function of time (0 – 24 h at 37°C) and starting bulk 2N4R tau concentration (0.4  $\mu\text{M}$ , red; 0.5  $\mu\text{M}$ , blue; 0.6  $\mu\text{M}$ , green; 0.8  $\mu\text{M}$ , brown; 1  $\mu\text{M}$ , black), whereas lines depict a simulation of the best fit of each model to the data points.
